# Supplementary material for: Quaternary phosphonium-based (TPQPCl)-ionomer/graphite nanoplatelets composite chemically modified electrodes: a novel platform for sensing applications
Source: Royal Society of Chemistry journal article supplement (doi:10.1039/c8tc04967j), 2018-01-01
Supplement: c8tc04967j2.pdf [file c8tc04967j2.pdf]

## **Electronic Supporting Information (ESI)**

### **Quaternary Phosphonium-based (TPQPCl)-Ionomer/Graphite Nanoplatelets Composite Chemically Modified Electrodes: a Novel Platform for Sensing Applications**

Sandra Hernandez-Aldave,<sup>a</sup> Robert B. Kaspar,<sup>b</sup> Michael Letterio,<sup>b</sup> Afshin Tarat,<sup>c</sup> Yushan  
Yan,<sup>b</sup> and Paolo Bertoncello,<sup>\*a</sup>

<sup>a</sup> Systems and Process Engineering Centre, College of Engineering, Swansea University, Bay  
Campus, Swansea SA1 8EN, United Kingdom

<sup>b</sup> Department of Chemical and Biomolecular Engineering, University of Delaware, 150 Academy  
Street, Newark, DE 19716, USA

<sup>c</sup> Perpetuus Advanced Materials, Ammanford SA18 3EZ, Carmarthen, United Kingdom

## The dispersion of GNPs in the presence of TPQPCI

The presence of TPQPCI in the composite is beneficial to the dispersion of GNPs flakes and prevents aggregation. TPQPCI/GNPs nanocomposite shows good dispersion in water up to more than 2 months after the preparation. Figure S1a shows aggregation of pristine GNPs in water, whereas the TPQPCI//GNPs composite is well dispersed in the same solvent.

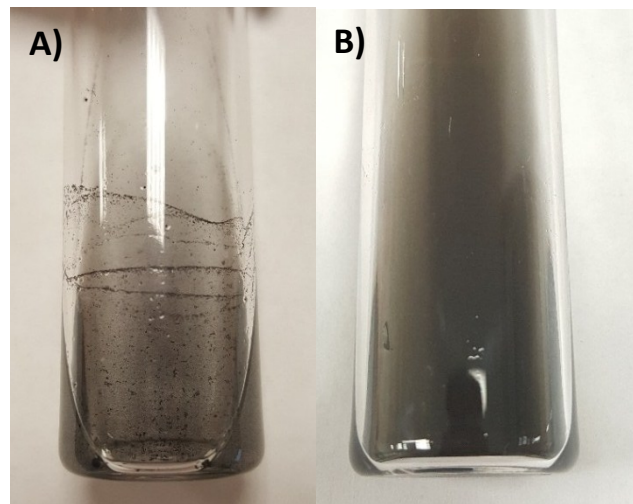

**Figure S1.** a) GNPs b) TPQPCI/GNPs dispersion in water after the sonication process.

## Scanning electron microscopy (SEM)

SEM image of 2  $\mu\text{L}$  TPQPCI/GNPs drop cast onto Si/SiO<sub>2</sub> slides shows the formation of a homogeneous layer.

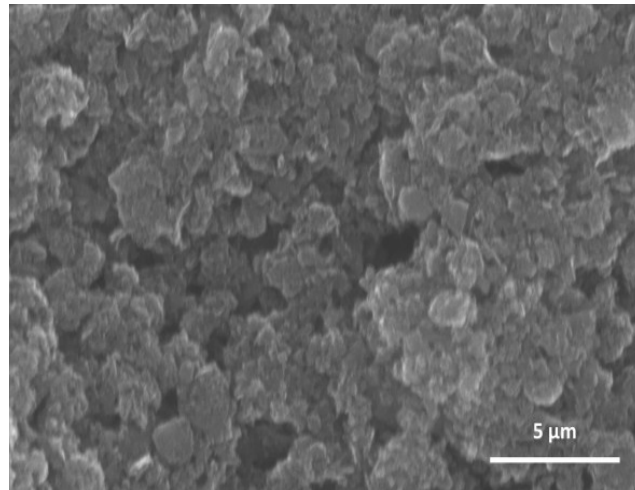

**Figure S2.** SEM picture of TPQPCI/GNPs 0.025% in Si/SiO<sub>2</sub>

## Raman Spectroscopy

Raman spectroscopy depicts the presence of GNPs and also provides information about the defect in the graphene flakes due to the defects induced during the nanocomposite synthesis.

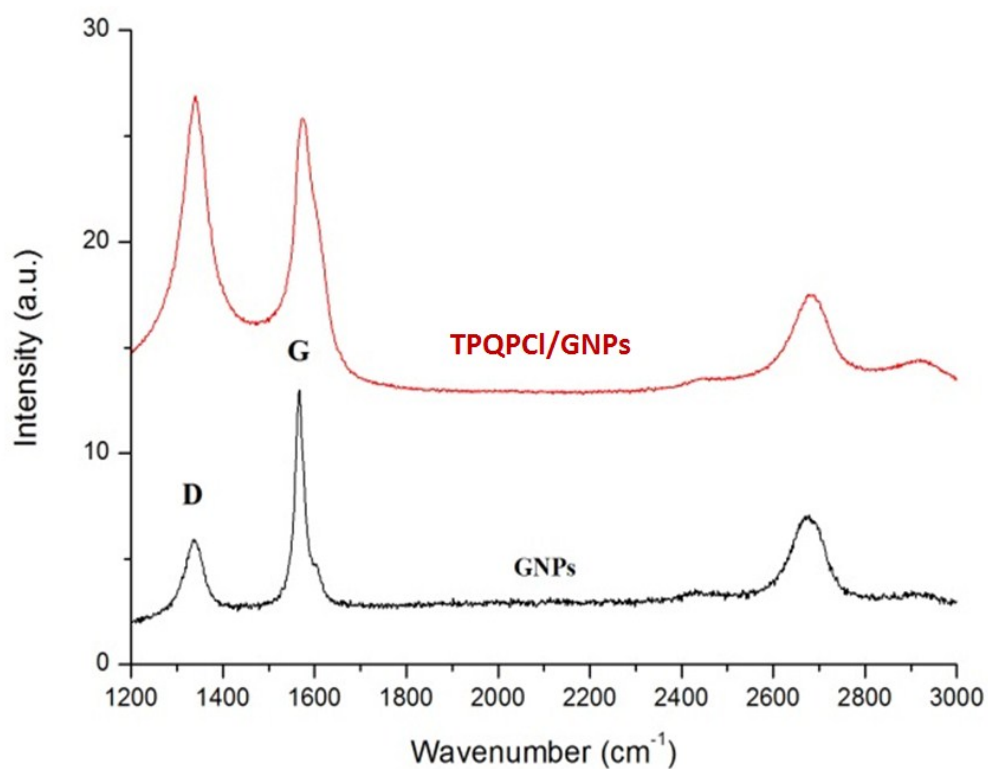

**Figure S3.** Raman spectrum of TPQPCI/GNPs 0.025% nanocomposite (red line) and GNPs alone (black line)

## Dependence of voltammetric peak with the scan rate

Figure S4 shows the dependence of the voltammetric peak of (A) TPQPCl and (B) TPQPCl/GNPs with the scan rate in the presence of 1 mM ascorbic acid in 0.1 M NaCl supporting electrolyte (pH 4). The peak current increases linearly with the increase of the square root of scan rate.

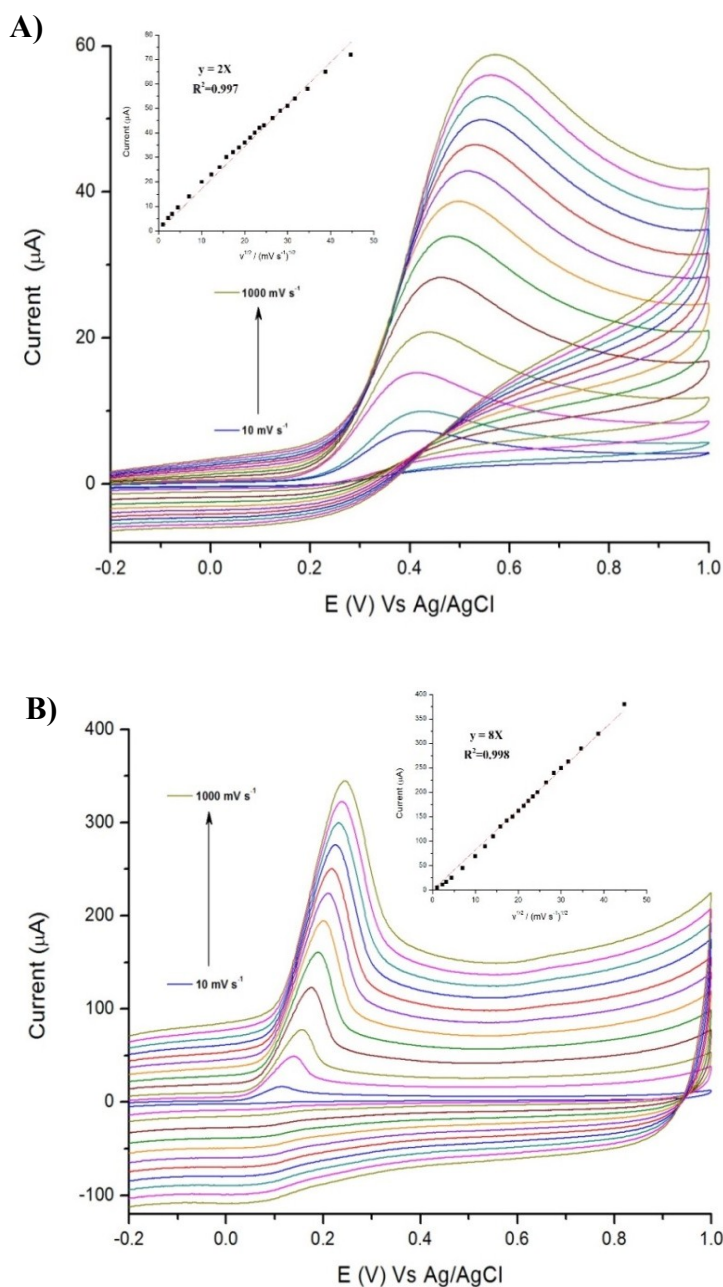

**Figure S4.** CVs of A) TPQPCl 0.025%, and B) TPQPCl/GNPs 0.025% recorded in 1 mM AA and 0.1 M NaCl supporting electrolyte (pH 4).; scan rates from 10  $\text{mV s}^{-1}$  to 1  $\text{V s}^{-1}$ . Inset: plot of peak current with the square root of scan rate.
